# Supplementary material for: Single-cell patterning regulation by physically modified silicon nanostructures
Source: Royal Society of Chemistry journal article supplement (doi:10.1039/d2ay00092j), 2022-01-01
Supplement: d2ay00092j1.pdf [file d2ay00092j1.pdf]

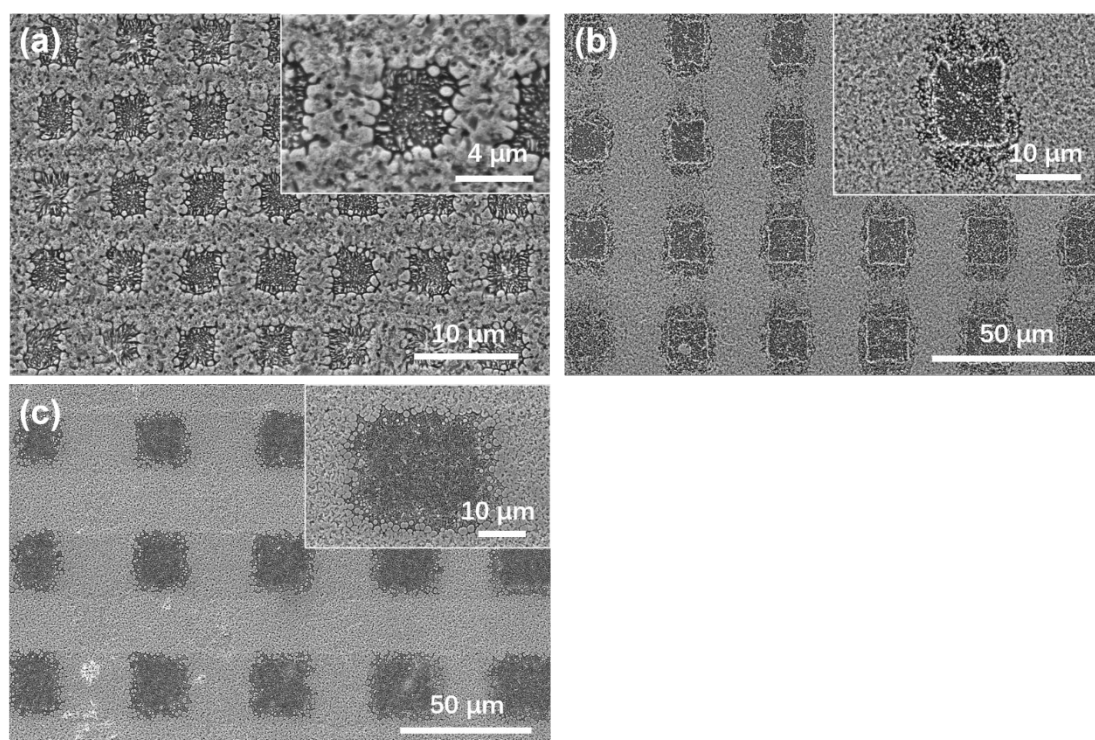

**Fig. S1.** SEM images of complex silicon patterns with period of (a) 7 μm (b) 31 μm (c) 48 μm.

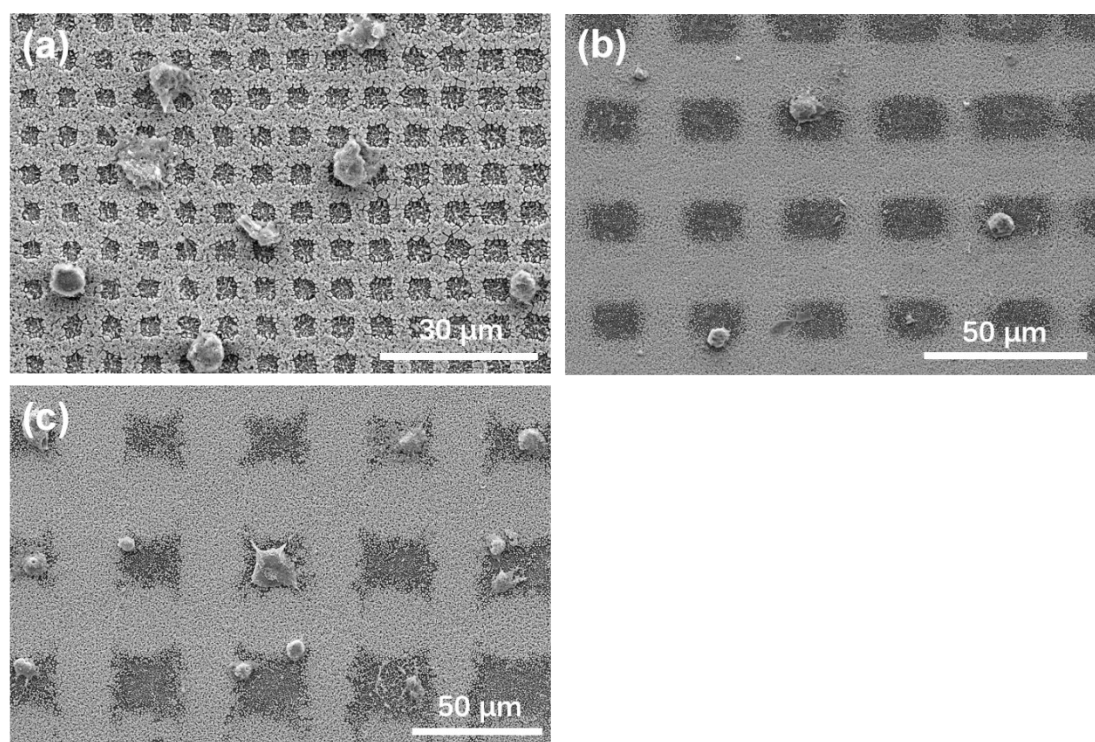

**Fig. S2.** SEM images of cells cultured on the grid structures with period of (a) 7 μm (b) 31 μm (c) 48 μm.
